# Supplementary material for: Alkannin-Induced Oxidative DNA Damage Synergizes With PARP Inhibition to Cause Cancer-Specific Cytotoxicity
Source: PubMed Central journal article supplement (PMC7844861; doi:10.3389/fphar.2020.610205), 2020-12-22
Supplement: presentation1.pdf [file presentation1.pdf]

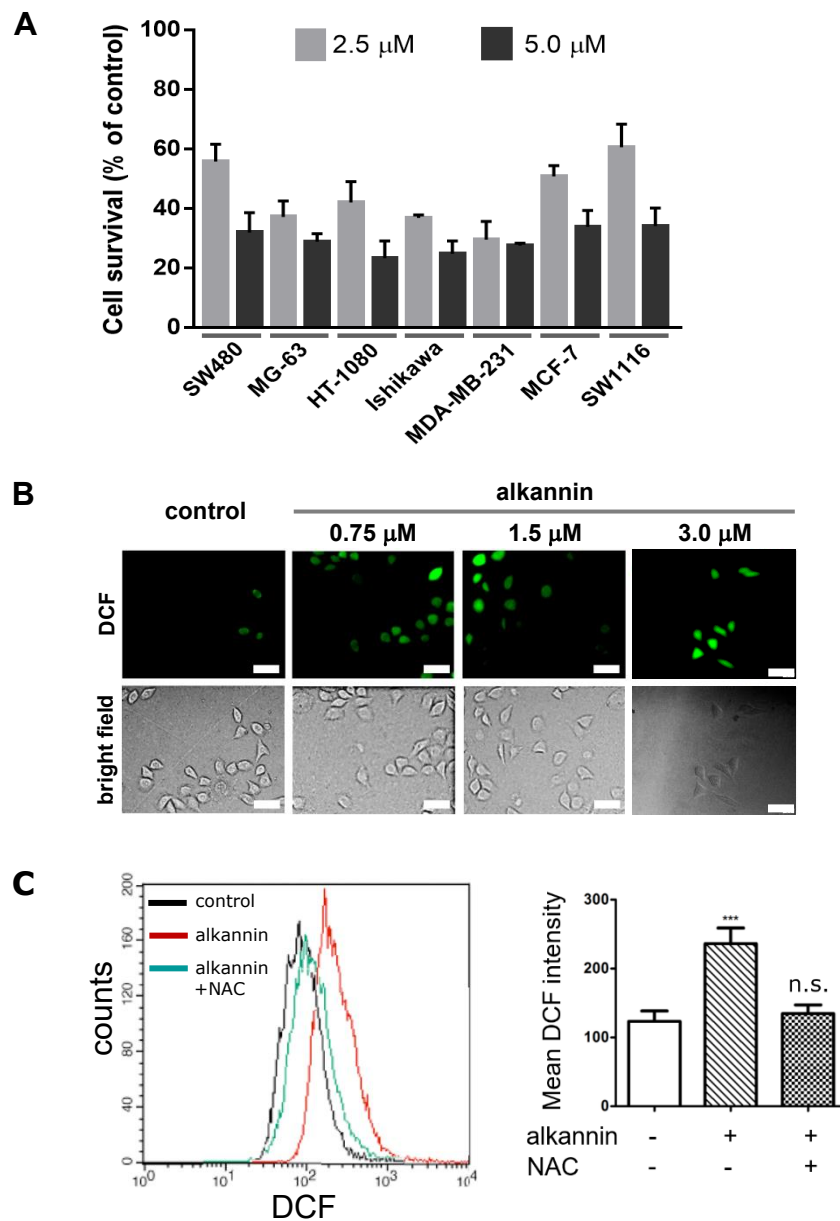

**Figure S1.** Sublethal alkannin elevates ROS levels in SW1116 colorectal cancer cells. **A** MTT assay. 24 h of treatment by alkannin dose-dependently inhibited the growth of the listed cancer cell lines ( $n = 3$ ). **B** Representative images of SW1116 cells stained by DCFH-DA. 3 h of treatment by all three doses of alkannin induced a marked increase in ROS levels (scale bar: 50  $\mu\text{m}$ ). **C** Measurement of ROS by flow cytometry. 3 h of treatment by 0.75  $\mu\text{M}$  alkannin induced a significant ROS increase in the SW1116 cancer cells, which was suppressed by NAC. Data of three independent experiments were presented as mean  $\pm$  SD. n.s.: not significant, \*\*\*:  $p < 0.001$  vs vehicle control.

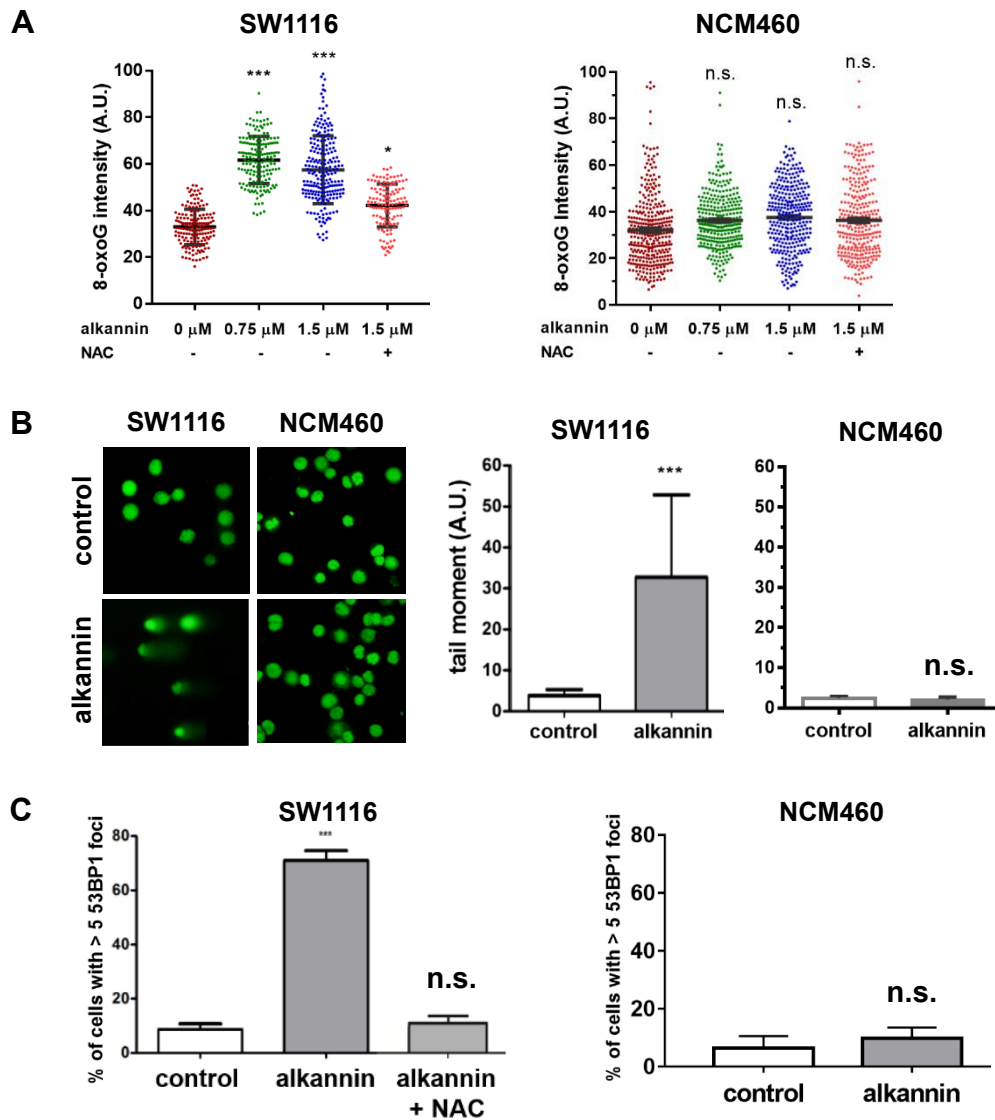

**Figure S2.** Alkannin-induced ROS elevation causes oxidative DNA damage in SW1116 cancer cells. **A** Measurement of 8-oxoG. 3 h of treatment by 1.5 and 0.75  $\mu$ M alkannin induced a marked increase in 8-oxoG levels in the SW1116 cancer but not the NCM460 noncancerous cells ( $n = 3$ ). NAC suppressed the 8-oxoG increase in the SW1116 cancer cells. **B** Alkaline comet assay. Treatment by 0.75  $\mu$ M alkannin for 3 h significantly increased the numbers of DNA strand breaks in the SW1116 cancer but not the NCM460 noncancerous cells. Tail moment was quantified by the TriTek CometScore software ( $n = 3$ ). **C** Induction of 53BP1 foci in SW1116 and NCM460 cells treated by 0.75  $\mu$ M alkannin for 3 h ( $n = 3$ ). n.s.: not significant, \*\*\*:  $p < 0.001$  vs vehicle control.

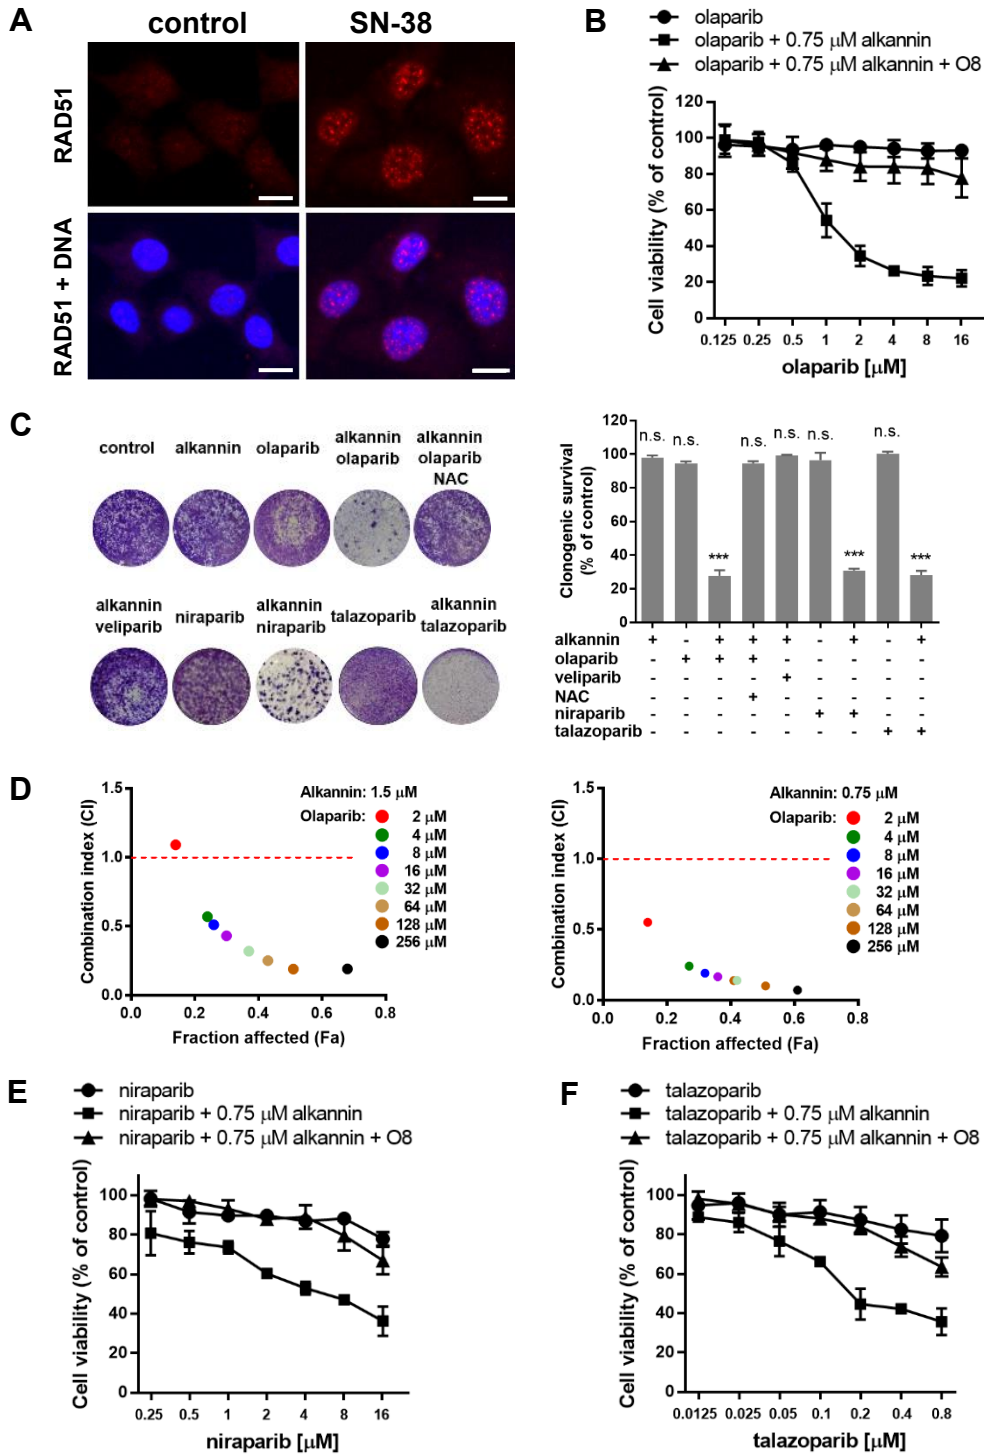

**Figure S3.** Sublethal alkannin sensitizes SW1116 cancer cells to PARP-trapping. **A** SW1116 cells readily formed RAD51 foci in response to 12 h of treatment by 5  $\mu$ M SN-38 (scale bars: 10  $\mu$ m). **B** MTT assay. SW1116 cells were treated with olaparib alone or together with 0.75  $\mu$ M alkannin with or without the OGG1 inhibitor O8 for 72 h. **C** Colony formation assay. SW1116 cells were treated by the indicated drugs for 7 days (alkannin 0.75  $\mu$ M, olaparib 10  $\mu$ M, veliparib 10  $\mu$ M, niraparib 5  $\mu$ M, talazoparib 0.25  $\mu$ M). Data from three independent experiments were presented as mean  $\pm$  SD. **D** Determination of combination index (CI) values. SW1116 cells were treated by 1.5 or 0.75  $\mu$ M alkannin and olaparib for 72 h. **E-F**: MTT assay. SW1116 cells were treated with niraparib (**E**) or talazoparib (**F**) alone or together with 0.75  $\mu$ M alkannin with or without the OGG1 inhibitor O8 for 72 h. n.s.: not significant, \*\*\*:  $p < 0.001$  vs vehicle control.

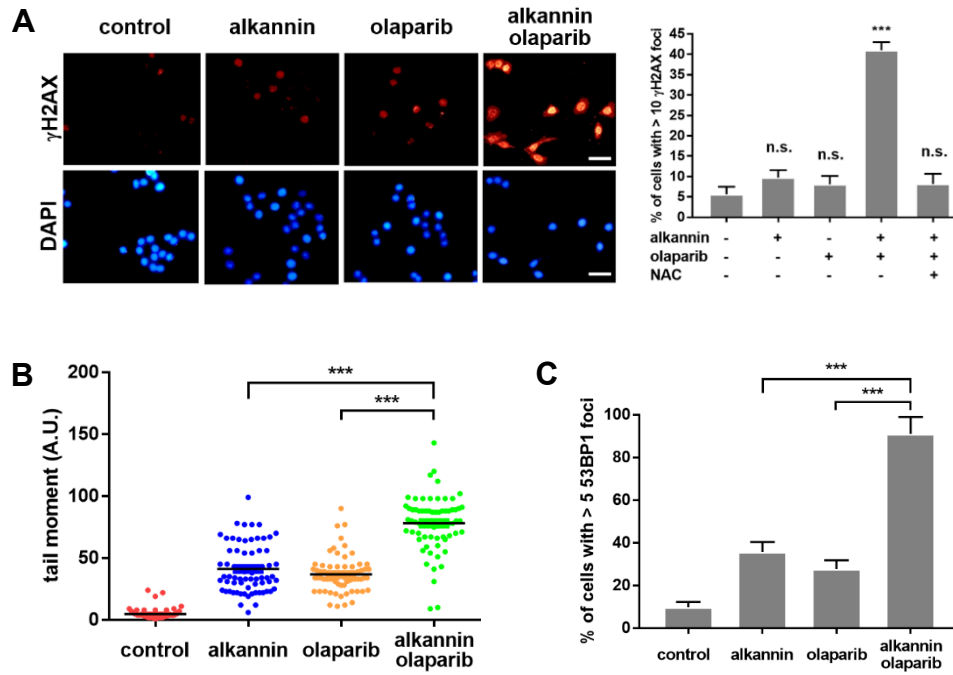

**Figure S4.** The combination of alkannin and olaparib induces intense replication stress and extensive DNA strand breaks in SW1116 cancer cells. SW1116 cells were treated by 0.75  $\mu$ M alkannin, 10  $\mu$ M olaparib or the combination of the two, with or without NAC, for 3 h. **A** Immunofluorescent staining of  $\gamma$ H2AX (scale bars: 25  $\mu$ m). Data from three independent experiments were presented as mean  $\pm$  SD. n.s.: not significant, \*\*\*:  $p < 0.001$  vs vehicle control. **B** Alkaline comet assay and **C** 53BP1 staining ( $n = 3$ ). \*\*\*:  $p < 0.001$ , alkannin and olaparib combined vs alkannin or olaparib alone.

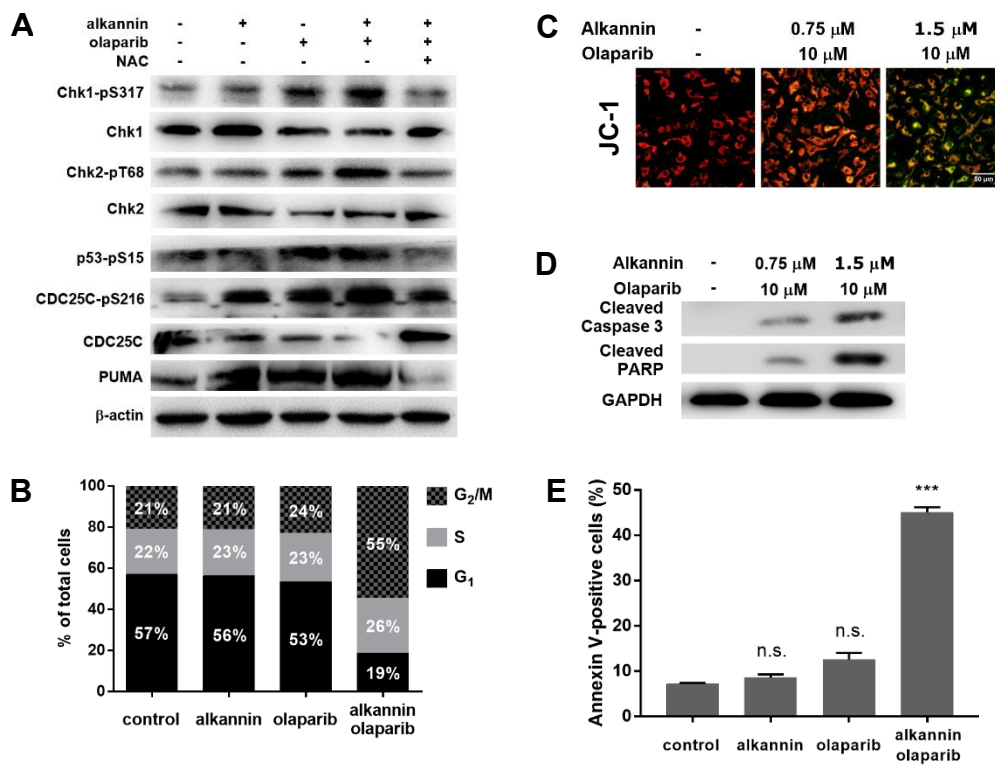

**Figure S5.** The combination of alkannin and olaparib activates DDR and induces cell cycle arrest and apoptosis in SW1116 cancer cells. **A** Western blot. SW1116 cells were treated by 0.75  $\mu$ M alkannin, 10  $\mu$ M olaparib or the combination of the two, with or without NAC, for 3 h. **B** Flow cytometry analysis of cell cycle. SW1116 cells were treated by 0.75  $\mu$ M alkannin, 10  $\mu$ M olaparib or the combination of the two for 48 h (n = 3). **C** Measurement of mitochondrial membrane potential and **D** Western blot. SW480 cells were treated by the combination of 0.75 or 1.5  $\mu$ M alkannin and 10  $\mu$ M olaparib for 12 h. **E** Flow cytometry analysis of apoptosis. SW1116 cells were treated by 0.75  $\mu$ M alkannin, 10  $\mu$ M olaparib or the combination of the two for 48 h (n = 3). n.s.: not significant, \*:  $p < 0.05$ , \*\*\*:  $p < 0.001$  vs vehicle control.
